# Supplementary material
Source: PubMed Central journal article supplement (PMC3157221)
Supplement: mmc1.pdf [file mmc1.pdf]

**H&E**

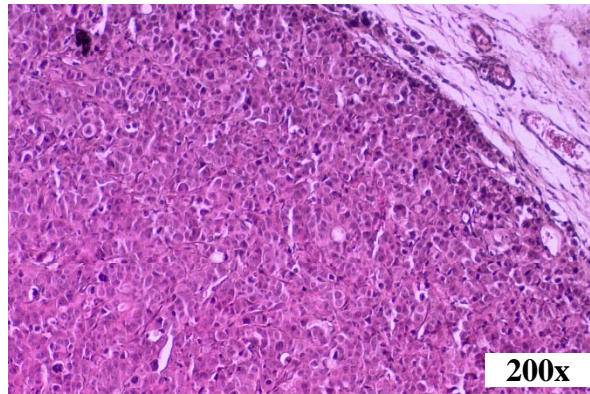

**Cytokeratin 18**

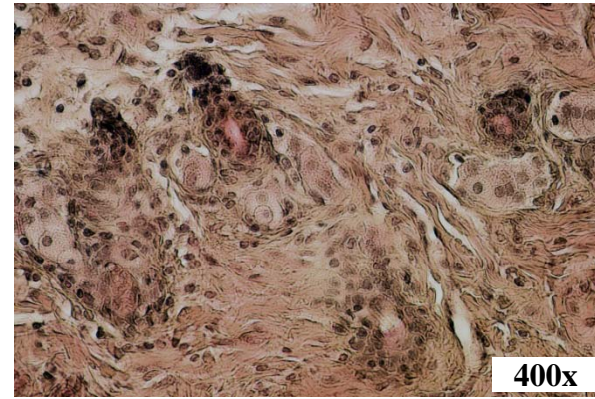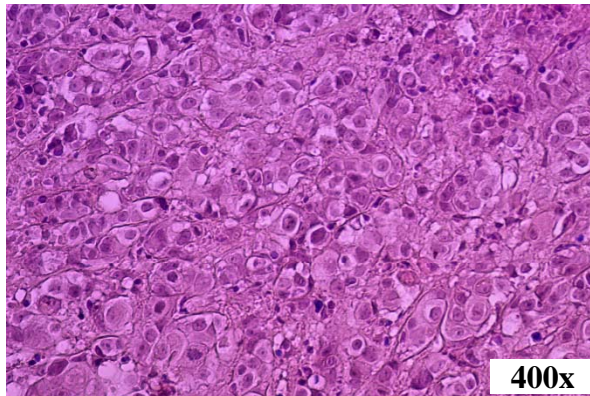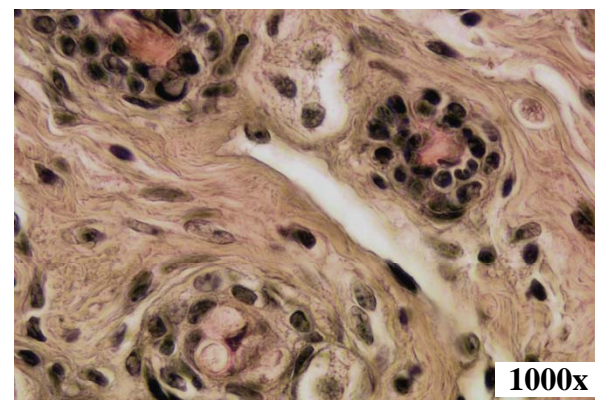

**Supplemental Figure S1. Staining of MCF-7 xenograft tumors.**

Representative tumor sections from mice at 12<sup>th</sup> week were formalin fixed, paraffin embedded, sectioned, and stained with hematoxylin and eosin Y (H&E) or incubated with a mouse monoclonal antibody directed against human cytokeratin 18 as described in *Materials and Methods*. Cytokeratin 18 expression appears as brown cytoplasmic staining.
